# Supplementary material for: libcloudph++ 1.0: a single-moment bulk, double-moment bulk, and particle-based warm-rain microphysics library in C++
Source: Copernicus journal article supplement (doi:10.5194/gmd-8-1677-2015), 2015-06-09
Supplement: Supplementary file 1 [file gmd-8-1677-2015-supplement.zip]

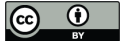

## *Supplement of*

# **libcloudph++ 1.0: a single-moment bulk, double-moment bulk, and particle-based warm-rain microphysics library in C++**

**S. Arabas et al.**

*Correspondence to:* S. Arabas ([sarabas@igf.fuw.edu.pl](mailto:sarabas@igf.fuw.edu.pl)) and H. Pawlowska ([hanna.pawlowska@igf.fuw.edu.pl](mailto:hanna.pawlowska@igf.fuw.edu.pl))

- [gmd-8-1677-2015-supplement-cover-letter.pdf](#)
- [libcloudphxx-1.0.0](#)
  - .travis.yml
  - CMakeLists.txt
  - COPYING
  - CREDITS
  - README
  - bindings
    - \* CMakeLists.txt
    - \* python
  - include
    - \* CMakeLists.txt
    - \* libcloudph++
  - libcloudph++-config.cmake
  - src
    - \* CMakeLists.txt
    - \* detail
    - \* lib.cpp
    - \* lib.hpp
    - \* lib\_cpp.cpp
    - \* lib\_cuda.cu
    - \* lib\_omp.cpp
    - \* particles.hpp
    - \* particles\_diag.hpp
    - \* particles\_impl\_adve.hpp
    - \* particles\_impl\_bcnd.hpp

- \* particles\_impl\_chem.ipp
- \* particles\_impl\_coal.ipp
- \* particles\_impl\_cond.ipp
- \* particles\_impl\_fill\_outbuf.ipp
- \* particles\_impl\_hskpng\_Tpr.ipp
- \* particles\_impl\_hskpng\_count.ipp
- \* particles\_impl\_hskpng\_ijk.ipp
- \* particles\_impl\_hskpng\_sort.ipp
- \* particles\_impl\_hskpng\_vterm.ipp
- \* particles\_impl\_init\_chem.ipp
- \* particles\_impl\_init\_dry.ipp
- \* particles\_impl\_init\_e2l.ipp
- \* particles\_impl\_init\_grid.ipp
- \* particles\_impl\_init\_hskpng.ipp
- \* particles\_impl\_init\_kernel.ipp
- \* particles\_impl\_init\_sync.ipp
- \* particles\_impl\_init\_wet.ipp
- \* particles\_impl\_init\_xyz.ipp
- \* particles\_impl\_kernel.ipp
- \* particles\_impl\_moms.ipp
- \* particles\_impl\_rcyc.ipp
- \* particles\_impl\_sedi.ipp
- \* particles\_impl\_sstp.ipp
- \* particles\_impl\_sync.ipp
- \* particles\_init.ipp
- \* particles\_pimpl\_ctor.ipp
- \* particles\_step.ipp
- \* tpl\_rw\_t\_wrapper.hpp
- tests
  - \* CMakeLists.txt
  - \* bisect
  - \* blk2m\_hello\_world
  - \* common
  - \* fake\_units
  - \* paper\_GMD\_2015
  - \* particles
  - \* python
  - \* theta
  - \* zip

The copyright of individual parts of the supplement might differ from the CC-BY 3.0 licence.
